# Supplementary material for: Modelled Cost-Effectiveness of a Package Size Cap and a Kilojoule Reduction Intervention to Reduce Energy Intake from Sugar-Sweetened Beverages in Australia
Source: MDPI journal article supplement (doi:10.3390/nu9090983), 2017-09-06
Supplement: s1 [file s1]

## Online supplementary materials

*Supplementary table S1: Estimated effects of package size cap and energy reduction interventions on the 2010 Australian population over their lifetime\**

| Modelled scenarios            |                         | Average energy intake (baseline) (kJ/day/person) | Average consumption from SSBs before intervention (kJ/day/person) | Average consumption from SSBs after intervention (kJ/day/person) | Estimated change in energy in response to intervention (kJ/day/person) | Average body weight (baseline) (kg) | Average change in weight in response to intervention (kg) | Average change in BMI in response to intervention (kg/m <sup>2</sup> ) |
|-------------------------------|-------------------------|--------------------------------------------------|-------------------------------------------------------------------|------------------------------------------------------------------|------------------------------------------------------------------------|-------------------------------------|-----------------------------------------------------------|------------------------------------------------------------------------|
| Package size cap intervention | Scenario A1 (base case) | 8,664.8                                          | 564.4                                                             | 550.0                                                            | -14.4                                                                  | 71.1                                | -0.12                                                     | -0.05                                                                  |
|                               | Scenario A2             | 8,664.8                                          | 564.4                                                             | 553.6                                                            | -10.8                                                                  | 71.1                                | -0.09                                                     | -0.04                                                                  |
|                               | Scenario A3             | 8,664.8                                          | 564.4                                                             | 497.0                                                            | -67.4                                                                  | 71.1                                | -0.57                                                     | -0.23                                                                  |
|                               | Scenario A4             | 8,664.8                                          | 564.4                                                             | 561.5                                                            | -2.88                                                                  | 71.1                                | -0.02                                                     | -0.01                                                                  |
|                               | Scenario A5             | 8,664.8                                          | 564.4                                                             | 562.3                                                            | -2.16                                                                  | 71.1                                | -0.02                                                     | -0.01                                                                  |
|                               | Scenario A6             | 8,664.8                                          | 564.4                                                             | 508.5                                                            | -55.9                                                                  | 71.1                                | -0.47                                                     | -0.19                                                                  |
| Energy reduction intervention | Scenario B1 (base case) | 8,664.8                                          | 564.4                                                             | 536.8                                                            | -27.6                                                                  | 71.1                                | -0.23                                                     | -0.10                                                                  |
|                               | Scenario B2             | 8,664.8                                          | 564.4                                                             | 398.7                                                            | -165.7                                                                 | 71.1                                | -1.39                                                     | -0.56                                                                  |
|                               | Scenario B3             | 8,664.8                                          | 564.4                                                             | 558.8                                                            | -5.6                                                                   | 71.1                                | -0.05                                                     | -0.02                                                                  |
|                               | Scenario B4             | 8,664.8                                          | 564.4                                                             | 530.5                                                            | -33.9                                                                  | 71.1                                | -0.29                                                     | -0.11                                                                  |

\*data presented is for the entire population (all ages and sexes)
